# Supplementary material
Source: PubMed Central journal article supplement (PMC6686750)
Supplement: supplementarymaterial_090318_bhy280.pdf [file supplementarymaterial_090318_bhy280.pdf]

## Supplementary Table 1. Behavioral Results

|                                | Accuracy              |                      | Response Time        |                      |
|--------------------------------|-----------------------|----------------------|----------------------|----------------------|
|                                | AB vs. CB             | AB vs. S             | AB vs. CB            | AB vs. S             |
| Effect of Digit-Number         | F(1,31)=0.002, p=0.96 | F(1,30)=2.37, p=0.13 | F(1,31)=1.35, p=0.25 | F(1,30)=0.66, p=0.42 |
| Effect of Algebraic Complexity | F(1,31)=3.01, p=0.09  | F(1,30)=6.51, p=0.02 | F(1,31)=0.28, p=0.60 | F(1,30)=5.12, p=0.03 |
| Effect of Task                 | F(1,31)=2.57, p=0.12  | F(1,30)=0.31, p=0.59 | F(1,31)=1.27, p=0.27 | F(1,30)=1.46, p=0.24 |
| Math                           | t(31)=1.41, p=0.17    | t(30)=2.1, p=0.04    | t(31)=-1.85, p=0.07  | t(30)=1.67, p=0.11   |
| Sentences                      | t(31)=3.60, p=0.001   | t(30)=2.03, p=0.051  | t(31)=-2.54, p=0.02  | t(30)=0.87, p=0.39   |

## Supplementary Table 2. Brain regions active during math and language tasks

| Brain regions active for math > language                        | x   | y   | z  | Peak t | mm2     | Pcluster |
|-----------------------------------------------------------------|-----|-----|----|--------|---------|----------|
| <b>Adult-Onset Blind Group</b>                                  |     |     |    |        |         |          |
| Left postcentral sulcus                                         | 40  | -40 | 37 | 13.56  | 3247.83 | 0.0008   |
| Left intraparietal sulcus and transverse parietal sulci         | 31  | -65 | 34 | 10.53  |         |          |
| Left precuneus                                                  | 7   | -65 | 50 | 9.05   |         |          |
| Left marginal branch of the cingulate sulcus                    | 7   | -33 | 43 | 6.84   | 671.49  | 0.043    |
| Right intraparietal sulcus and transverse parietal sulci        | 29  | -51 | 44 | 12.67  | 2274.23 | 0.0002   |
| Right supramarginal gyrus                                       | 56  | -41 | 42 | 10.78  |         |          |
| Right middle occipital gyrus                                    | 35  | -79 | 34 | 9.01   |         |          |
| Right superior occipital sulcus and transverse occipital sulcus | 28  | -64 | 29 | 7.5    |         |          |
| Right superior parietal lobule                                  | 17  | -68 | 54 | 7.09   |         |          |
| Right inferior temporal sulcus                                  | 55  | -53 | -4 | 5.98   | 590.13  | 0.033    |
| Right inferior occipital gyrus and sulcus                       | 45  | -82 | -9 | 5.08   |         |          |
| Right marginal branch of the cingulate sulcus                   | 7   | -38 | 43 | 11.66  | 579.53  | 0.0332   |
| <b>Congenitally Blind Group</b>                                 |     |     |    |        |         |          |
| Left superior parietal lobule                                   | -17 | -70 | 45 | 9.62   | 4297.49 | 0.0002   |
| Left supramarginal gyrus                                        | -52 | -39 | 47 | 7.96   |         |          |
| Left middle occipital gyrus                                     | -38 | -88 | 16 | 6.25   |         |          |
| Left middle frontal gyrus                                       | -39 | 50  | 9  | 8.39   | 1703.1  | 0.003    |
| Left middle frontal gyrus                                       | -44 | 31  | 30 | 6.46   |         |          |
| Left fronto-marginal gyrus and sulcus                           | -23 | 56  | -7 | 5.02   |         |          |
| Left superior frontal sulcus                                    | -21 | 7   | 50 | 9.51   | 1127.99 | 0.0086   |
| Left posterior-dorsal part of the cingulate gyrus               | -6  | -30 | 29 | 6.88   | 871.01  | 0.016    |
| Left marginal branch of the cingulate sulcus                    | -11 | -41 | 45 | 6.46   |         |          |
| Left middle-anterior part of the cingulate gyrus and sulcus     | -8  | 8   | 45 | 6.4    | 642.01  | 0.0286   |
| Left anterior part of the cingulate gyrus and sulcus            | -9  | 35  | 26 | 6.32   |         |          |
| Right sulcus intermedius primus                                 | 43  | -44 | 36 | 10.3   | 3551.84 | 0.002    |
| Right intraparietal sulcus and transverse parietal sulci        | 19  | -63 | 53 | 9.07   |         |          |

|                                                               |    |     |     |      |         |        |
|---------------------------------------------------------------|----|-----|-----|------|---------|--------|
| Right marginal branch of the cingulate sulcus                 | 7  | -41 | 44  | 7.95 |         |        |
| Right middle frontal gyrus                                    | 38 | 27  | 39  | 7.36 | 1591.46 | 0.0068 |
| Right inferior frontal sulcus                                 | 43 | 33  | 20  | 7.12 |         |        |
| Right middle frontal sulcus                                   | 30 | 50  | 0   | 5.89 |         |        |
| Right middle occipital sulcus and lunatus sulcus              | 33 | -82 | 9   | 6.83 | 1204.35 | 0.0092 |
| Right superior frontal sulcus                                 | 28 | 6   | 51  | 8.29 | 925.6   | 0.0138 |
| Right middle-posterior part of the cingulate gyrus and sulcus | 3  | 3   | 34  | 7.45 | 570.11  | 0.0342 |
| Right superior frontal gyrus                                  | 6  | 23  | 43  | 6.62 |         |        |
| Right medial occipito-temporal sulcus and lingual sulcus      | 31 | -45 | -14 | 6.04 | 455.74  | 0.0476 |

### Sighted Group

|                                                          |    |     |    |       |         |        |
|----------------------------------------------------------|----|-----|----|-------|---------|--------|
| Left intraparietal sulcus and transverse parietal sulci  | 33 | -43 | 44 | 7.86  | 2594.9  | 0.0012 |
| Left angular gyrus                                       | 33 | -65 | 45 | 7.41  |         |        |
| Left superior parietal lobule                            | 10 | -61 | 64 | 6.03  |         |        |
| Left precuneus                                           | 14 | -75 | 46 | 5.94  |         |        |
| Left marginal branch of the cingulate sulcus             | 16 | -39 | 42 | 10.96 | 1043.9  | 0.0072 |
| Right marginal branch of the cingulate sulcus            | 13 | -28 | 38 | 7.7   | 2172.41 | 0.0008 |
| Right intraparietal sulcus and transverse parietal sulci | 22 | -63 | 43 | 6.34  |         |        |
| Right middle occipital gyrus                             | 40 | -80 | 30 | 5.99  |         |        |
| Right intraparietal sulcus and transverse parietal sulci | 36 | -46 | 36 | 5.99  | 941.89  | 0.0074 |
| Right supramarginal gyrus                                | 58 | -36 | 44 | 5.02  |         |        |
| Right calcarine sulcus                                   | 12 | -75 | 6  | 4.18  | 457     | 0.0366 |
| Right calcarine sulcus                                   | 25 | -55 | 1  | 3.9   |         |        |
| Right superior frontal gyrus                             | 7  | 0   | 59 | 5.13  | 450.49  | 0.037  |
| Right superior part of the precentral sulcus             | 31 | -4  | 46 | 4.94  | 431.03  | 0.0406 |
| Right superior frontal gyrus                             | 18 | 14  | 62 | 4.66  |         |        |

### Congenitally Blind Group > Adult-Onset Blind Group

|                                |    |     |    |      |        |       |
|--------------------------------|----|-----|----|------|--------|-------|
| Right superior occipital gyrus | 14 | -92 | 15 | 4.67 | 483.51 | 0.046 |
| Right middle occipital gyrus   | 30 | -89 | 12 | 4.53 |        |       |

### Congenitally Blind Group > Sighted Group

|                                                          |     |     |     |      |        |        |
|----------------------------------------------------------|-----|-----|-----|------|--------|--------|
| Left middle occipital gyrus                              | -34 | -88 | 14  | 4.98 | 528.72 | 0.0312 |
| Left middle occipital sulcus and lunatus sulcus          | -25 | -95 | 1   | 4.78 |        |        |
| Right middle occipital sulcus and lunatus sulcus         | 33  | -82 | 9   | 6.52 | 807.7  | 0.011  |
| Right medial occipito-temporal sulcus and lingual sulcus | 32  | -45 | -14 | 5.43 | 548.72 | 0.027  |

### Brain regions active for language > math

|                                                   | x   | y   | z   | Peak t | mm2     | Pcluster |
|---------------------------------------------------|-----|-----|-----|--------|---------|----------|
| <b>Adult-Onset Blind Group</b>                    |     |     |     |        |         |          |
| Left superior temporal gyrus                      | -61 | -15 | 3   | 11.81  | 3684.03 | 0.0002   |
| Left planum polare of the superior temporal gyrus | -47 | 7   | -17 | 11.14  |         |          |
| Left superior temporal sulcus                     | -51 | -49 | 5   | 9.74   |         |          |
| Left superior temporal sulcus                     | -54 | -19 | -15 | 8.88   |         |          |
| Left superior temporal sulcus                     | -41 | -63 | 19  | 7.08   |         |          |
| Left opercular part of the inferior frontal gyrus | -52 | 25  | 17  | 7.36   | 835.81  | 0.0242   |
| Left orbital sulci                                | -38 | 31  | -13 | 6.54   |         |          |

|                                                     |    |     |     |      |         |        |
|-----------------------------------------------------|----|-----|-----|------|---------|--------|
| Left precuneus                                      | -5 | -61 | 31  | 7.28 | 781.82  | 0.0268 |
| Right superior temporal sulcus                      | 57 | -9  | -20 | 9.98 | 1576.82 | 0.0014 |
| Right lateral aspect of the superior temporal gyrus | 48 | 15  | -21 | 9.88 |         |        |
| Right lateral aspect of the superior temporal gyrus | 64 | -5  | -4  | 7.88 |         |        |

### **Congenitally Blind Group**

|                                                        |     |     |     |       |         |        |
|--------------------------------------------------------|-----|-----|-----|-------|---------|--------|
| Left lateral aspect of the superior temporal gyrus     | -61 | -14 | -5  | 13.01 | 4536.4  | 0.0002 |
| Left superior temporal sulcus                          | -53 | -39 | 3   | 9.03  |         |        |
| Left lateral aspect of the superior temporal gyrus     | -46 | 16  | -26 | 8.68  |         |        |
| Left triangular part of the inferior frontal gyrus     | -55 | 23  | 12  | 8.52  | 1166.59 | 0.0108 |
| Left orbital part of the inferior frontal gyrus        | -47 | 32  | -14 | 7.08  |         |        |
| Left orbital gyri                                      | -31 | 18  | -22 | 5.57  |         |        |
| Left superior frontal gyrus                            | -9  | 61  | 25  | 7.66  | 876.66  | 0.016  |
| Left subparietal sulcus                                | -10 | -55 | 26  | 9.64  | 799.73  | 0.019  |
| Right lateral aspect of the superior temporal gyrus    | 65  | -10 | 0   | 12.51 | 5884.37 | 0.0002 |
| Right superior temporal sulcus                         | 49  | -13 | -15 | 12.07 |         |        |
| Right planum polare of the superior temporal gyrus     | 39  | 9   | -27 | 9.7   |         |        |
| Right superior temporal sulcus                         | 51  | -60 | 19  | 9.41  |         |        |
| Right superior temporal sulcus                         | 45  | -40 | 3   | 8.55  |         |        |
| Right parahippocampal gyrus                            | 25  | -7  | -30 | 8.01  |         |        |
| Right anterior occipital sulcus and preoccipital notch | 45  | -69 | 10  | 7.09  |         |        |
| Right triangular part of the inferior frontal gyrus    | 56  | 24  | 18  | 8.87  | 1309.03 | 0.0092 |
| Right triangular part of the inferior frontal gyrus    | 52  | 32  | -4  | 7.72  |         |        |
| Right superior frontal gyrus                           | 10  | 56  | 32  | 7.64  | 978.34  | 0.0152 |
| Right superior frontal gyrus                           | 10  | 15  | 65  | 5.6   |         |        |
| Right lateral occipito-temporal gyrus (fusiform gyrus) | 38  | -48 | -22 | 8.69  | 891.01  | 0.017  |
| Right anterior transverse collateral sulcus            | 41  | -8  | -35 | 6.59  |         |        |
| Right subparietal sulcus                               | 8   | -56 | 36  | 9.01  | 635.66  | 0.0278 |
| Right straight gyrus                                   | 6   | 54  | -13 | 8.58  | 633.27  | 0.0282 |

### **Sighted Group**

|                                                                     |     |     |     |       |         |        |
|---------------------------------------------------------------------|-----|-----|-----|-------|---------|--------|
| Left lateral aspect of the superior temporal gyrus                  | -50 | 13  | -21 | 12.91 | 4568.42 | 0.0002 |
| Left superior temporal sulcus                                       | -54 | -46 | 0   | 10.68 |         |        |
| Left lateral aspect of the superior temporal gyrus                  | -57 | -15 | -8  | 9.85  |         |        |
| Left superior temporal sulcus                                       | -44 | -67 | 26  | 5.01  |         |        |
| Left horizontal ramus of the anterior segment of the lateral sulcus | -44 | 31  | -3  | 9.91  | 950.64  | 0.0112 |
| Left superior frontal gyrus                                         | -6  | 55  | 32  | 10.72 | 902.06  | 0.0132 |
| Left superior frontal gyrus                                         | -8  | 12  | 66  | 6.37  |         |        |
| Left subparietal sulcus                                             | -12 | -51 | 36  | 8.66  | 811.73  | 0.0154 |
| Right lateral aspect of the superior temporal gyrus                 | 47  | 13  | -20 | 10.68 | 3109.97 | 0.0002 |
| Right lateral aspect of the superior temporal gyrus                 | 62  | -6  | -7  | 9.61  |         |        |
| Right superior temporal sulcus                                      | 52  | -33 | 1   | 8.97  |         |        |
| Right middle temporal gyrus                                         | 61  | -35 | -6  | 7.18  |         |        |
| Right precuneus                                                     | 5   | -58 | 31  | 6.23  | 642.25  | 0.018  |

### **Congenitally Blind Group > Adult-Onset Blind Group**

|                                                        |    |     |     |      |         |        |
|--------------------------------------------------------|----|-----|-----|------|---------|--------|
| Right superior temporal sulcus                         | 51 | -6  | -17 | 6.01 | 2604.86 | 0.0002 |
| Right lateral occipito-temporal sulcus                 | 42 | -52 | -17 | 5.52 | 518.55  | 0.0436 |
| <b>Congenitally Blind Group &gt; Sighted Group</b>     |    |     |     |      |         |        |
| Right anterior occipital sulcus and preoccipital notch | 46 | -68 | 8   | 5.96 | 689.95  | 0.016  |
| Right lateral occipito-temporal sulcus                 | 42 | -50 | -18 | 6.14 | 533.68  | 0.0316 |
| Right calcarine sulcus                                 | 17 | -74 | 9   | 5    | 477.16  | 0.0386 |

Peaks of brain regions active more for math than language ( $p < 0.05$ , cluster corrected;  $p < 0.01$  cluster-forming threshold; 20 mm minimum distance between peaks). Coordinates reported in MNI space. Peak t: t values corresponding to local maxima; mm<sup>2</sup>: area occupied by cluster on cortical surface; Pcluster: P value for entire cluster

**Supplementary Table 3. Results of ROI Analysis for Math Task**

|      |                      | AB Group                   | AB vs. CB                 | AB vs. S                  | S                         |
|------|----------------------|----------------------------|---------------------------|---------------------------|---------------------------|
| IPS  | Effect of Digit      | F(1,12)=14.38,<br>p=0.003  | F(1,31)=0.002,<br>p=0.96  | F(1,30)=0.95,<br>p=0.34   | --                        |
|      | Effect of Alg. Comp. | (1,12)=0.20,<br>p=0.66     | F(1,31)=0.84,<br>p=0.37   | F(1,30)=3.18,<br>p=0.09   | --                        |
|      | Effect of Task       | F(1,12)=187.91,<br>p<0.001 | F(1,31)=0.13,<br>p=0.72   | F(1,30)=1.63,<br>p=0.21   | --                        |
| rMOG | Effect of Digit      | F(1,12)=2.90,<br>p=0.12    | F(1,31)=9.58,<br>p=0.004  | F(1,30)=2.88,<br>p=0.10   | --                        |
|      | Effect of Alg. Comp. | F(1,12)=0.06,<br>p=0.82    | F(1,31)=3.28,<br>p=0.08   | F(1,30)=0.00<br>4, p=0.95 | --                        |
|      | Effect of Task       | t(12)=2.28,<br>p=0.04      | F(1,31)=10.72,<br>p=0.003 | F(1,30)=1.27,<br>p=0.27   | --                        |
| rV1  | Effect of Digit      | F(1,12)=1.16,<br>p=0.30    | F(1,31)=4.18,<br>p=0.05   | F(1,30)=0.09,<br>p=0.77   | F(1,18)=1.70,<br>p=0.21   |
|      | Effect of Alg. Comp. | F(1,12)=0.90,<br>p=0.36    | F(1,31)=0.17,<br>p=0.69   | F(1,30)=2.58,<br>p=0.12   | F(1,18)=10.67,<br>p=0.004 |
|      | Effect of Task       | t(12)=2.72,<br>p=0.13      | F(1,31)=18.87,<br>p<0.001 | F(1,30)=3.43,<br>p=0.07   | F(1,18)=14.59,<br>p=0.001 |

**Supplementary Table 4. Results of resting-state functional connectivity seed-to-ROI analysis**

|                                               |                                                 | AB vs S              | AB vs CB             | CB vs S                | AB Group             | CB Group               | S Group              |
|-----------------------------------------------|-------------------------------------------------|----------------------|----------------------|------------------------|----------------------|------------------------|----------------------|
| Correlation with rIPS ROI                     | Main effect of seed (rMOG vs rVOT)              | F(1,53)=2.00, p=0.16 | F(1,34)=0.17, p=0.68 | F(1,65)=5.32, p=0.02   | t(11)=3.52, p=0.005  | t(23)=5.00, p<0.001    | t(42)=2.08, p=0.04   |
|                                               | Main effect of group across seed (rMOG vs rVOT) | F(1,53)=1.68, p=0.20 | F(1,34)=6.14, p=0.02 | F(1,65)=24.49, p<0.001 | N/A                  | N/A                    | N/A                  |
| Correlation with Math DLFC and Lang rIFC ROIs | Seed by ROI interaction                         | F(1,53)=2.40, p=0.13 | F(1,34)=1.28, p=0.27 | F(1,65)=12.39, p=0.001 | F(1,11)=7.81, p=0.02 | F(1,23)=23.41, p<0.001 | F(1,42)=6.57, p=0.01 |
|                                               | Main effect of group across seed (rMOG vs rVOT) | F(1,53)=1.15, p=0.29 | F(1,34)=3.25, p=0.08 | F(1,65)=16.11, p<0.001 | N/A                  | N/A                    | N/A                  |

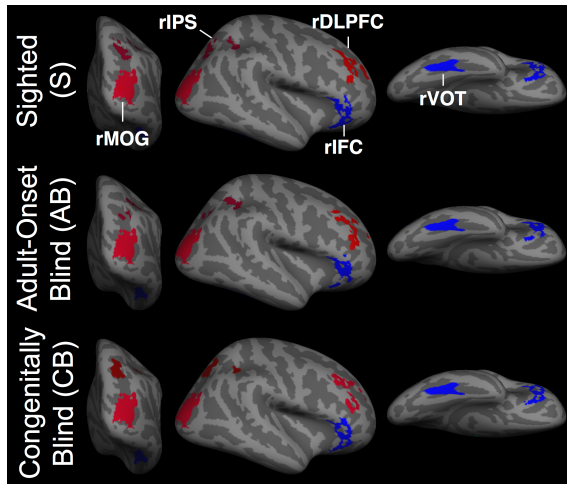

**Supplementary Figure 1 Resting-State Regions of Interest.** Regions of interest (ROIs) used for resting-state analysis in sighted, adult-onset blind and congenitally blind groups. Red colors indicate ROIs of math network and blue colors indicate ROIs of language network. Visual cortex ROIs are identical across groups. Prefrontal and parietal ROIs defined separately for each group.

## Correlation with IPS

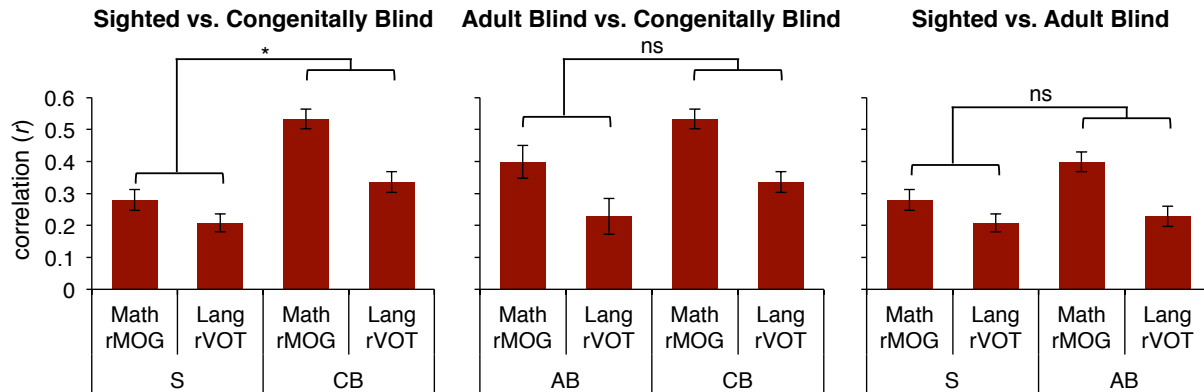

## Correlation with PFC

Correlation with math rDLPFC

Correlation with language rIFC

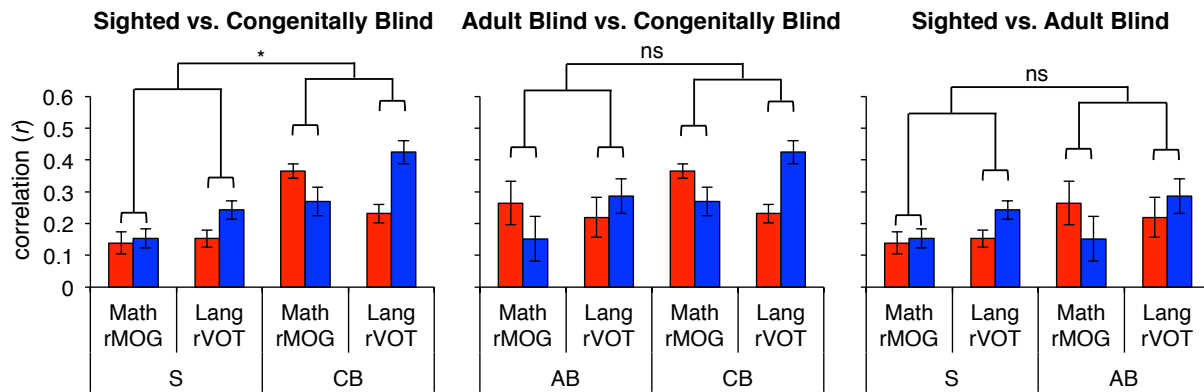

**Supplementary Figure 2 Resting-State Functional Connectivity Results.** Group interactions of resting-state functional connectivity analyses.
